# Supplementary material
Source: Springer Nature journal article supplement (https://www.springermedizin.de/resource/supplementary/12889_2013_5999_MOESM1_ESM.pdf/9494108)

■ Water 
 ■ Soda 
 ■ Alcohol 
 ■ Coffee 
 ■ Tea 
 ■ Milk 
 ■ Fruit juice/drinks 
 ■ Sports/energy (s/e) 
 ■ Food 
 ■ Shortfall

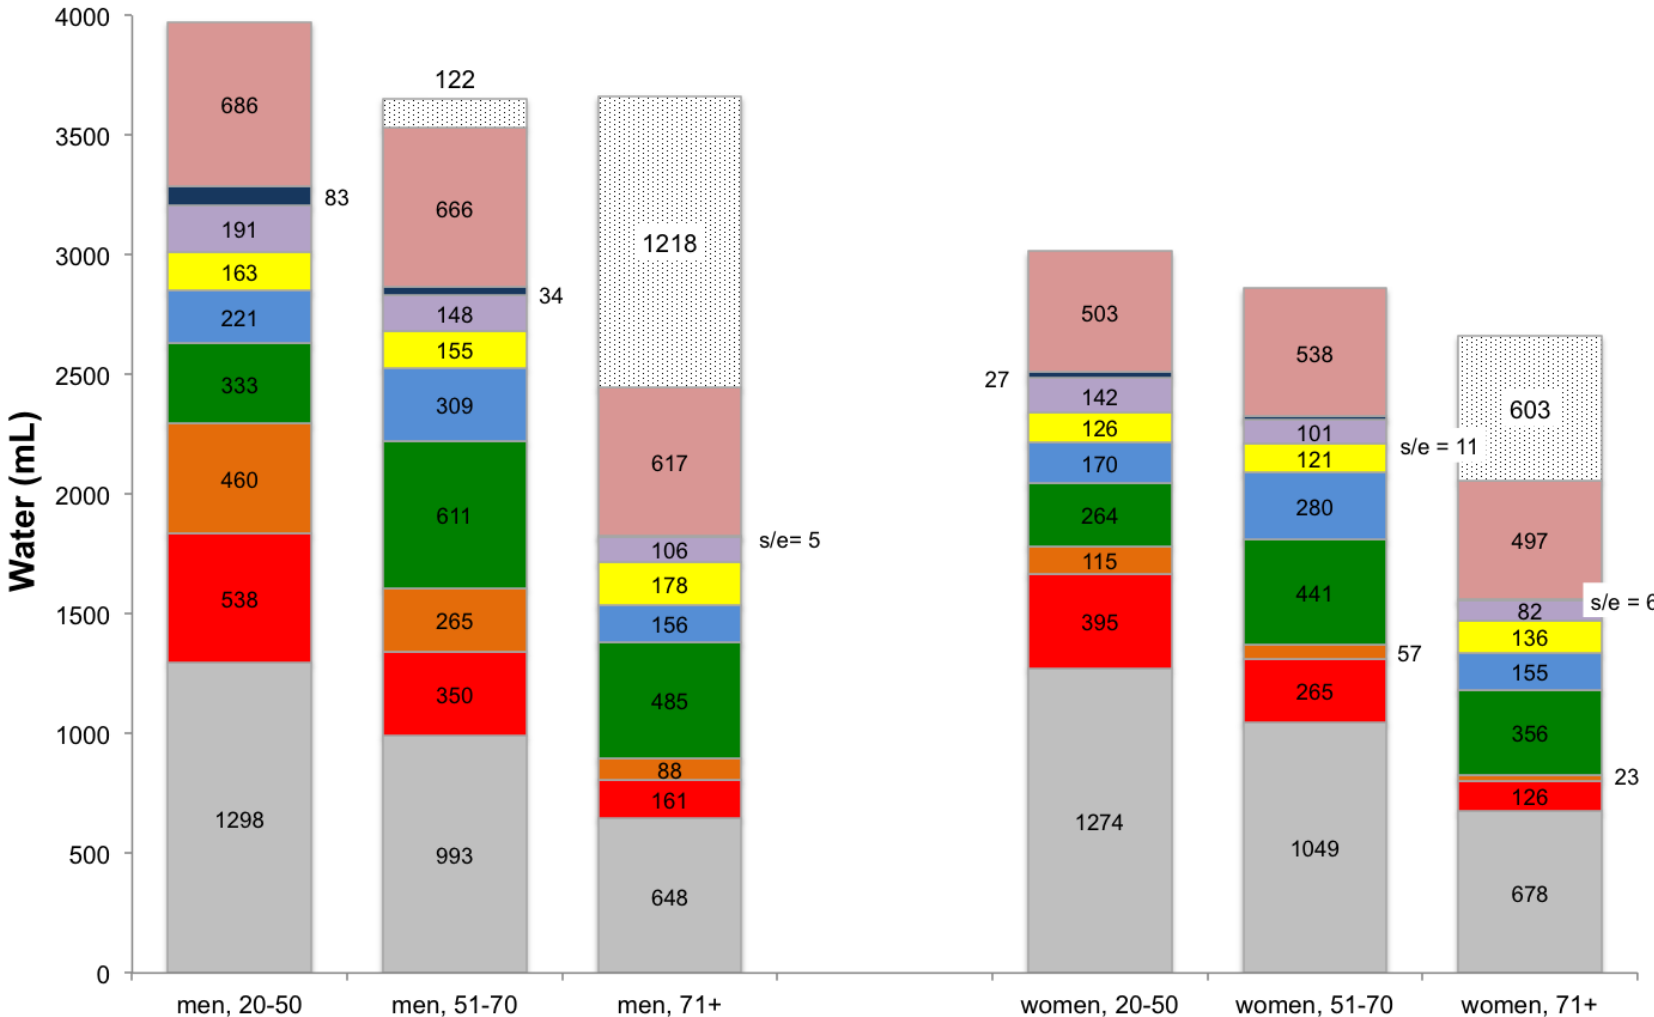

Supplement: MOESM1 [file 9494108]
